# Supplementary material for: Exacerbation of Cisplatin Cellular Toxicity by Regulation of the Human Organic Cation Transporter 2 through Angiotensin II
Source: MDPI journal article supplement (doi:10.3390/ijms232415866), 2022-12-14
Supplement: s1 [file s1]

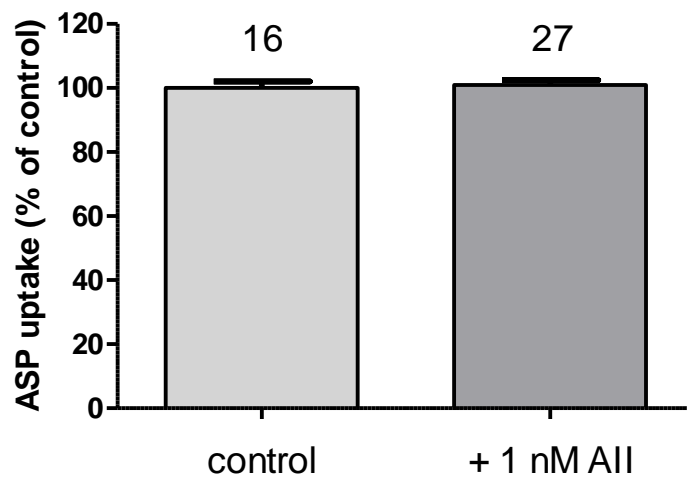

Supplementary material Figure S1: This figure shows the ASP<sup>+</sup> uptake measured in human embryonic kidney cells (HEK293 cells) cells stably transfected with hOCT2. Incubation for 10 minutes with 1 nM angiotensin II (AII) did not change the uptake rate of 1  $\mu$ M ASP<sup>+</sup> compared with control measurements, which were set to 100%. The numbers on the columns show the number of replicates measured in at least 3 independent experiments. The experiments were performed as previously described in [1]

1. Frenzel; Köppen; Bauer; Karst; Schröter; Tzvetkov; Ciarimboli Effects of Single Nucleotide Polymorphism Ala270Ser (Rs316019) on the Function and Regulation of HOCT2. *Biomolecules* **2019**, *9*, 578, doi:10.3390/biom9100578.
